# Supplementary material
Source: PubMed Central journal article supplement (PMC4494119)
Supplement: NIHMS673789-supplement-Supplemental_Digital_Content_1.pdf [file NIHMS673789-supplement-Supplemental_Digital_Content_1.pdf]

**Supplemental Digital Content 1. VEGF-pathway gene SNPs genotyped in the initial cohort.** SNPs in bold were also genotyped in a validation cohort, and minor allele frequency (MAF) and Hardy-Weinberg equilibrium (HWE) values are presented from initial/validation cohorts, respectively.

| SNP               | Gene               | Location          | Alleles | MAF <sup>a</sup>          | HWE p value        | Rationale for genotyping                          |
|-------------------|--------------------|-------------------|---------|---------------------------|--------------------|---------------------------------------------------|
| rs3829387         | <i>FLT1</i>        | 5' upstream       | A>C     | 0.20 (0.20)               | 0.07               | Cancer survival association <sup>2</sup>          |
| rs7321093         | <i>FLT1</i>        | 5' upstream       | C>T     | 0.42 (0.46)               | 0.31               | Cancer survival association <sup>2</sup>          |
| <b>rs7996030</b>  | <b><i>FLT1</i></b> | intron            | G>A     | 0.17/0.21 (0.24)          | 0.08/0.20          | tSNP <sup>3</sup> /putative function <sup>4</sup> |
| rs9554330         | <i>FLT1</i>        | intron            | G>A     | 0.23 (0.30)               | 0.48               | tSNP <sup>3</sup> /putative function <sup>4</sup> |
| rs9319434         | <i>FLT1</i>        | intron            | A>T     | 0.25 (0.25)               | 0.45               | tSNP <sup>3</sup> /putative function <sup>4</sup> |
| rs9513114         | <i>FLT1</i>        | intron            | T>C     | 0.25 (0.25)               | 0.005              | tSNP <sup>3</sup> /putative function <sup>4</sup> |
| rs1853581         | <i>FTL1</i>        | intron            | A>C     | 0.36 (0.38)               | 0.72               | tSNP <sup>3</sup> /putative function <sup>4</sup> |
| rs614820          | <i>FLT1</i>        | intron            | T>C     | 0.33 (0.31)               | 0.14               | tSNP <sup>3</sup> /putative function <sup>4</sup> |
| rs7337610         | <i>FLT1</i>        | intron            | C>T     | 0.36 (0.35)               | 0.03               | tSNP <sup>3</sup> /putative function <sup>4</sup> |
| rs9551465         | <i>FLT1</i>        | intron            | T>A     | 0.45 (0.42)               | 0.74               | tSNP <sup>3</sup> /putative function <sup>4</sup> |
| rs9513112         | <i>FLT1</i>        | intron            | G>A     | 0.40 (0.33)               | 0.74               | tSNP <sup>3</sup> /putative function <sup>4</sup> |
| rs9513087         | <i>FLT1</i>        | intron            | A>T     | 0.16 (0.19)               | 0.22               | tSNP <sup>3</sup> /putative function <sup>4</sup> |
| rs9513095         | <i>FLT1</i>        | intron            | T>C     | 0.31 (0.30)               | 0.71               | tSNP <sup>3</sup> /putative function <sup>4</sup> |
| <b>rs9582036</b>  | <b><i>FLT1</i></b> | intron            | A>C     | 0.28/0.29 (0.29)          | 0.15/0.02          | tSNP <sup>3</sup> /putative function <sup>4</sup> |
| rs542403          | <i>FRS2</i>        | 3'UTR             | A>G     | 0.16 (0.17 <sup>#</sup> ) | 0.36               | LCL eQTL <sup>1</sup>                             |
| rs7219            | <i>GRB2</i>        | 3'UTR             | A>G     | 0.15 (0.21)               | 0.35               | Putative function <sup>5</sup>                    |
| rs2301113         | <i>HIF1A</i>       | intron            | A>C     | 0.19 (0.17)               | 0.20               | tSNP <sup>3</sup>                                 |
| rs1951795         | <i>HIF1A</i>       | intron            | C>A     | 0.17 (0.13)               | 0.14               | tSNP <sup>3</sup>                                 |
| rs11549465        | <i>HIF1A</i>       | exon (missense)   | C>T     | 0.09 (0.08)               | 0.62               | tSNP <sup>3</sup> /putative function <sup>4</sup> |
| rs1551643         | <i>KDR</i>         | 5' upstream       | T>A     | 0.33 (0.32)               | 0.83               | Functional evidence <sup>6</sup>                  |
| rs2071559         | <i>KDR</i>         | 5' upstream       | C>T     | 0.47 (0.50)               | 0.32               | Functional evidence <sup>6</sup>                  |
| rs7667298         | <i>KDR</i>         | 5'UTR             | C>T     | 0.45 (0.49)               | 0.40               | Functional evidence <sup>6</sup>                  |
| rs7655964         | <i>KDR</i>         | intron            | A>C     | 0.34 (0.30)               | 1.00               | Functional evidence <sup>6</sup>                  |
| rs1870377         | <i>KDR</i>         | exon (missense)   | T>A     | 0.27 (0.28)               | 0.30               | Functional evidence <sup>6</sup>                  |
| <b>rs12813551</b> | <b><i>KRAS</i></b> | intron            | T>C     | 0.38/0.40 (0.41)          | 0.29/0.60          | LCL eQTL <sup>1</sup>                             |
| <b>rs10505980</b> | <b><i>KRAS</i></b> | intron            | G>A     | 0.34/0.37 (0.39)          | 0.04/0.59          | LCL eQTL <sup>1</sup>                             |
| rs11047912        | <i>KRAS</i>        | intron            | T>C     | 0.21 (0.31)               | 0.03               | LCL eQTL <sup>1</sup>                             |
| <b>rs10842513</b> | <b><i>KRAS</i></b> | intron            | C>T     | 0.11/0.07 (0.11)          | 0.002/0.11         | LCL eQTL <sup>1</sup>                             |
| rs4246229         | <i>KRAS</i>        | intron            | A>G     | 0.43 (0.48)               | 0.008              | LCL eQTL <sup>1</sup>                             |
| rs1137282         | <i>KRAS</i>        | 3'-UTR            | T>C     | 0.17 (0.25)               | 0.14               | Putative function <sup>5</sup>                    |
| rs34176876        | <i>KRAS</i>        | 3'-UTR            | A>-     | 0.41 (0.40 <sup>5</sup> ) | 0.01               | NSCLC association <sup>7</sup>                    |
| rs1133228         | <i>MAP2K6</i>      | exon (synonymous) | C>A     | 0.47 (0.41)               | 0.005 <sup>^</sup> | Putative function <sup>4,5</sup>                  |
| rs2716197         | <i>MAP2K6</i>      | intron            | T>G     | 0.33 (0.35)               | 0.03               | Cancer survival association <sup>2</sup>          |
| rs2076139         | <i>MAPK11</i>      | exon (synonymous) | C>T     | 0.22 (0.30)               | 0.47               | LCL eQTL <sup>1</sup>                             |
| rs2228638         | <i>NRP1</i>        | exon (missense)   | G>A     | 0.07 (0.14)               | 0.54               | Putative function <sup>4</sup>                    |
| rs2359192         | <i>PGF</i>         | intron            | C>A     | 0.15 (0.19)               | 0.35               | LCL eQTL <sup>1</sup>                             |
| rs4356203         | <i>PIK3C2A</i>     | intron            | A>G     | 0.40 (0.42)               | 0.18               | LCL eQTL <sup>1</sup>                             |
| rs17561348        | <i>PIK3C2A</i>     | intron            | T>C     | 0.29 (0.33)               | 0.69               | LCL eQTL <sup>1</sup>                             |
| rs214936          | <i>PIK3C2A</i>     | exon (synonymous) | A>G     | 0.44(0.46)                | 0.62               | LCL eQTL <sup>1</sup>                             |
| rs11604561        | <i>PIK3C2A</i>     | exon (missense)   | T>C     | 0.13 (0.11)               | 0.45               | Putative function <sup>4</sup>                    |
| rs935661          | <i>PRKCE</i>       | intron            | A>C     | 0.46 (0.47)               | 0.87               | LCL eQTL <sup>1</sup>                             |
| rs11125055        | <i>PRKCE</i>       | intron            | G>T     | 0.15 (0.19)               | 0.09               | LCL eQTL <sup>1</sup>                             |
| rs3754562         | <i>PRKCE</i>       | intron            | G>C     | 0.31 (0.32)               | 0.85               | Putative function <sup>4</sup>                    |
| rs7576304         | <i>PRKCE</i>       | intron            | C>T     | 0.41 (0.44)               | 0.73               | LCL eQTL <sup>1</sup>                             |
| rs2345625         | <i>PRKCE</i>       | intron            | C>T     | 0.45 (0.41)               | 0.25               | LCL eQTL <sup>1</sup>                             |
| rs2345626         | <i>PRKCE</i>       | intron            | C>T     | 0.24 (0.30)               | 0.07               | LCL eQTL tSNP <sup>1</sup>                        |
| rs14138           | <i>PRKCE</i>       | 3'-UTR            | G>A     | 0.14 (0.17)               | 0.19               | LCL eQTL <sup>1</sup>                             |
| rs699947          | <i>VEGFA</i>       | 5' upstream       | C>A     | 0.44 (0.48)               | 0.51               | NSCLC survival association <sup>8</sup>           |
| rs1570360         | <i>VEGFA</i>       | 5' upstream       | G>A     | 0.39 (0.28 <sup>#</sup> ) | 1.00               | NSCLC survival association <sup>8</sup>           |
| rs2010963         | <i>VEGFA</i>       | 5'UTR             | G>C     | 0.26 (0.27 <sup>#</sup> ) | 0.13               | NSCLC survival association <sup>9</sup>           |
| rs3024997         | <i>VEGFA</i>       | intron            | G>A     | 0.26 (0.33)               | 0.13               | LCL eQTL <sup>1</sup>                             |
| rs3025006         | <i>VEGFA</i>       | intron            | C>T     | 0.32 (0.44 <sup>#</sup> ) | 0.02               | LCL eQTL <sup>1</sup>                             |
| rs3025039         | <i>VEGFA</i>       | 3'UTR             | C>T     | 0.16 (0.17 <sup>#</sup> ) | 0.54               | Putative function <sup>5</sup>                    |

\*MAFs from the present study shown with corresponding reference European MAF (CEU HapMap population unless otherwise specified) in brackets.

#reference European MAF from 1,000 Genomes CEU population.

^rs1133228 has shown a  $p=0.01$  for HWE in the HapMap CEU population ([http://www.ncbi.nlm.nih.gov/projects/SNP/snp\\_ref.cgi?rs=1133228](http://www.ncbi.nlm.nih.gov/projects/SNP/snp_ref.cgi?rs=1133228)).

¶reference European MAF from Coriell Cell Repository CEPH panel.

1. Pare-Brunet L, Glubb D, Evans P, et al. Discovery and functional assessment of gene variants in the vascular endothelial growth factor pathway. *Hum Mutat* 2013;35:227-35.
2. Innocenti F, Owzar K, Cox NL, et al. A genome-wide association study of overall survival in pancreatic cancer patients treated with gemcitabine in CALGB 80303. *Clin Cancer Res* 2012;18:577-84.
3. tSNPs (tagging SNPs) inferred from HapMap CEU population ( $r^2 \geq 0.8$ ; release #27)
4. Bioinformatic prediction of function by FastSNP
5. Bioinformatic prediction of function by FuncPred
6. Glubb DM, Cerri E, Giese A, et al. Novel functional germline variants in the VEGF receptor 2 gene and their effect on gene expression and microvessel density in lung cancer. *Clin Cancer Res* 2011; 17:5257-67.
7. Kohno T, Kunitoh H, Suzuki K, et al. Association of KRAS polymorphisms with risk for lung adenocarcinoma accompanied by atypical adenomatous hyperplasias. *Carcinogenesis* 2008;29:957-63.
8. Masago K, Fujita S, Kim YH, et al. Effect of vascular endothelial growth factor polymorphisms on survival in advanced-stage non-small-cell lung cancer. *Cancer Sci* 2009;100:1917-22.
9. Heist RS, Zhai R, Liu G, et al. VEGF polymorphisms and survival in early-stage non-small-cell lung cancer. *J Clin Oncol* 2008;26:856-62.
