# Supplementary material
Source: PubMed Central journal article supplement (PMC4494119)
Supplement: NIHMS673789-supplement-Supplemental_Digital_Content_5.pdf [file NIHMS673789-supplement-Supplemental_Digital_Content_5.pdf]

**Supplemental Digital Content 5. Initial cohort: nominal associations of SNPs with overall survival (OS,  $p < 0.05$ ) in Cox regression models adjusted for stage.** Results are ranked by significance of OS-SNP associations. The associations with  $p > 0.05$  are available upon request.

| <b>SNP</b> | <b>Alleles</b> | <b>Gene</b>  | <b>HR</b> | <b>95% CI</b> | <b>P value</b> | <b>Q value</b> |
|------------|----------------|--------------|-----------|---------------|----------------|----------------|
| rs7996030  | G>A            | <i>FLT1</i>  | 1.59      | 1.15 to 2.21  | 0.0052         | 0.0848         |
| rs9582036  | A>C            | <i>FLT1</i>  | 1.52      | 1.13 to 2.04  | 0.0054         | 0.0848         |
| rs12813551 | T>C            | <i>KRAS</i>  | 0.65      | 0.47 to 0.90  | 0.0089         | 0.0937         |
| rs10842513 | C>T            | <i>KRAS</i>  | 1.53      | 1.08 to 2.17  | 0.0168         | 0.1111         |
| rs10505980 | G>A            | <i>KRAS</i>  | 0.68      | 0.49 to 0.93  | 0.0176         | 0.1111         |
| rs542403   | A>G            | <i>FRS2</i>  | 0.63      | 0.41 to 0.95  | 0.0294         | 0.1544         |
| rs11549465 | C>T            | <i>HIF1A</i> | 1.61      | 1.01 to 2.56  | 0.0437         | 0.1554         |
| rs7219     | A>G            | <i>GRB2</i>  | 0.65      | 0.43 to 0.99  | 0.0471         | 0.1554         |
| rs1570360  | G>A            | <i>VEGFA</i> | 1.37      | 1.00 to 1.88  | 0.0496         | 0.1554         |
